# Supplementary material for: NKG2D Signaling Leads to NK Cell Mediated Lysis of Childhood AML
Source: J Immunol Res. 2015 Jul 8;2015:473175. doi: 10.1155/2015/473175 (PMC4510257; doi:10.1155/2015/473175)
Supplement: Supplementary file 1 — The supplementary material provides additional analyses regarding the impact of HLA E on NK cell mediated cytolysis, comparative analyses of donor A and B taking into account blast HLA I genotype and NKG2DL high versus low expression on NK cytolysis. [file 473175.f1.zip]

Archive with 9 entries (9 files):
- Figure_S1-1389913.cdr
- Figure_S2-1389914.cdr
- Figure_S3-1389915.cdr
- Figure_S3-1389916.cdr
- Figure_S4-1389917.cdr
- Figure_S5-1389918.cdr
- Figure_S6-1389919.cdr
- Table_S1-1389920.docx
- Table_S2-1389921.docx
